# Supplementary material for: Computational purification of individual tumor gene expression profiles leads to significant improvements in prognostic prediction
Source: PubMed Central journal article supplement (PMC3706990; doi:10.1186/gm433), 2013-03-28
Supplement: gm433-S17.PDF [file gm433-S17.PDF]

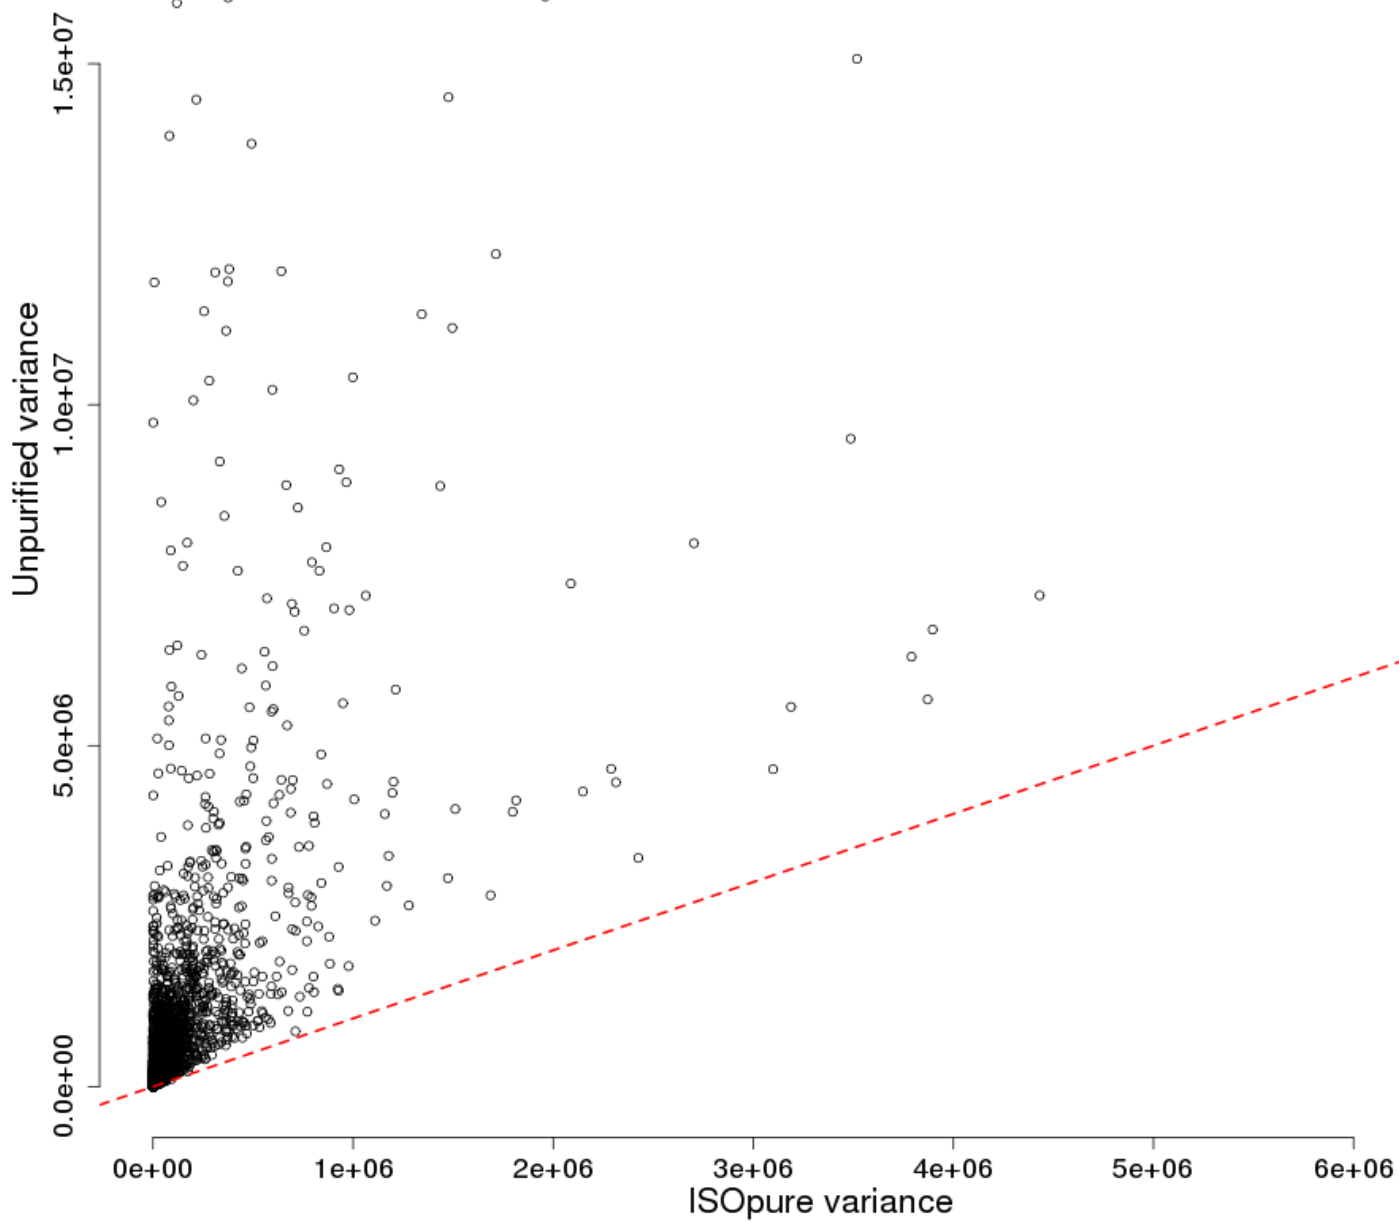

**Additional File 17: Figure S7**
